# Supplementary material for: MRI background parenchymal enhancement, fibroglandular tissue, and mammographic breast density in patients with invasive lobular breast cancer on adjuvant endocrine hormonal treatment: associations with survival
Source: Springer Nature journal article supplement (doi:10.1186/s13058-020-01329-z), 2020-08-20

## Additional File 1

**Figure A1:** Contrast-enhanced T1-weighted fat-suppressed subtraction maximum intensity projection images in the sagittal plane showing examples of minimal, mild, moderate and marked BPE, respectively.

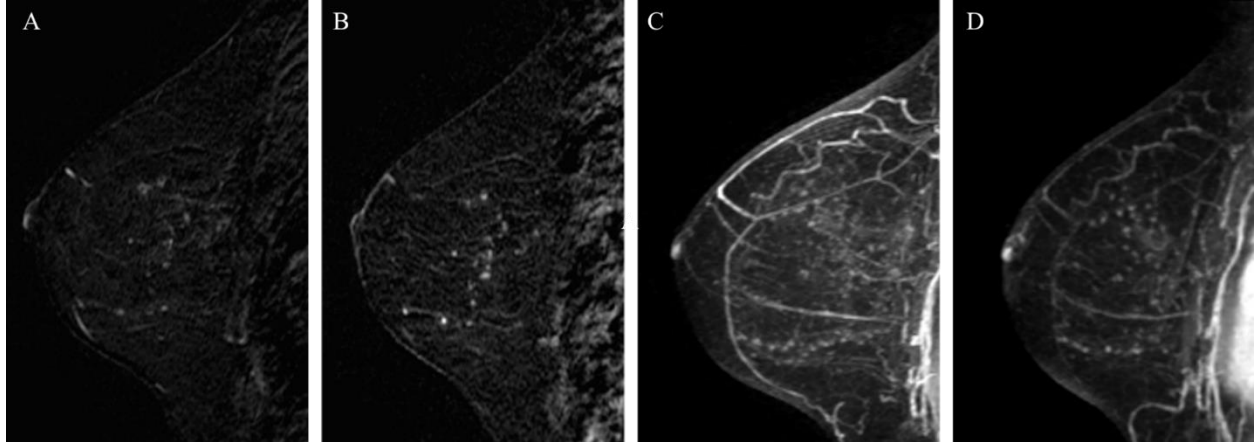

Supplement: MOESM1 [file 18302102]
