# Supplementary material for: MRI background parenchymal enhancement, fibroglandular tissue, and mammographic breast density in patients with invasive lobular breast cancer on adjuvant endocrine hormonal treatment: associations with survival
Source: Springer Nature journal article supplement (doi:10.1186/s13058-020-01329-z), 2020-08-20

## Additional File 2

**Figure A2:** Contrast-enhanced T1-weighted fat-suppressed images (A,B) and corresponding subtraction maximum intensity projection images (C,D) in the sagittal plane before (A,C) and after (B,D) onset of endocrine treatment showing mild change in BPE.

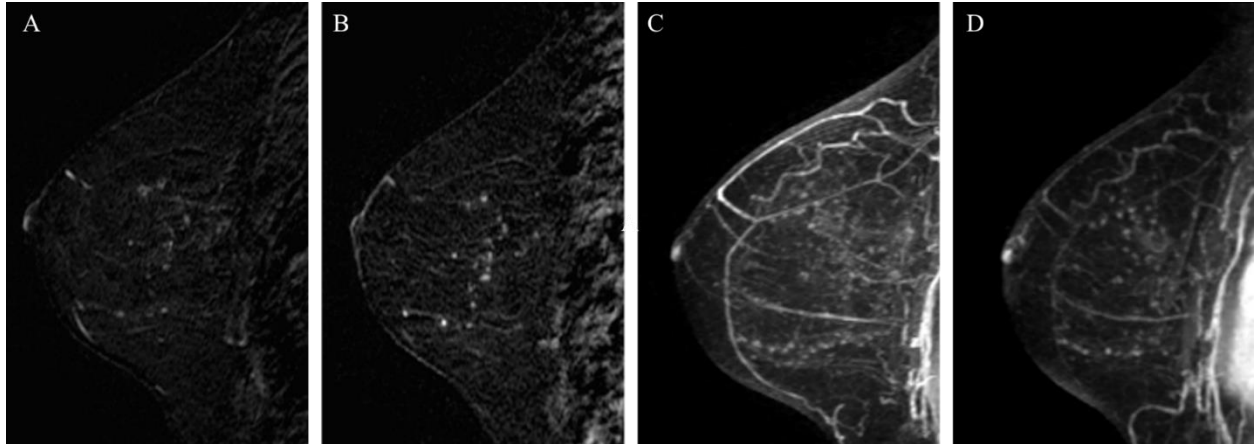

Supplement: MOESM2 [file 18302102]
