# Supplementary material for: MRI background parenchymal enhancement, fibroglandular tissue, and mammographic breast density in patients with invasive lobular breast cancer on adjuvant endocrine hormonal treatment: associations with survival
Source: Springer Nature journal article supplement (doi:10.1186/s13058-020-01329-z), 2020-08-20

**Additional File 5**

**Figure A5:** Kaplan–Meier plot of disease-free survival using FGT categories on MRI as strata. 1) almost entirely fat; 2) scattered fibroglandular tissue; 3) heterogeneous fibroglandular tissue; 4) extreme fibroglandular tissue.

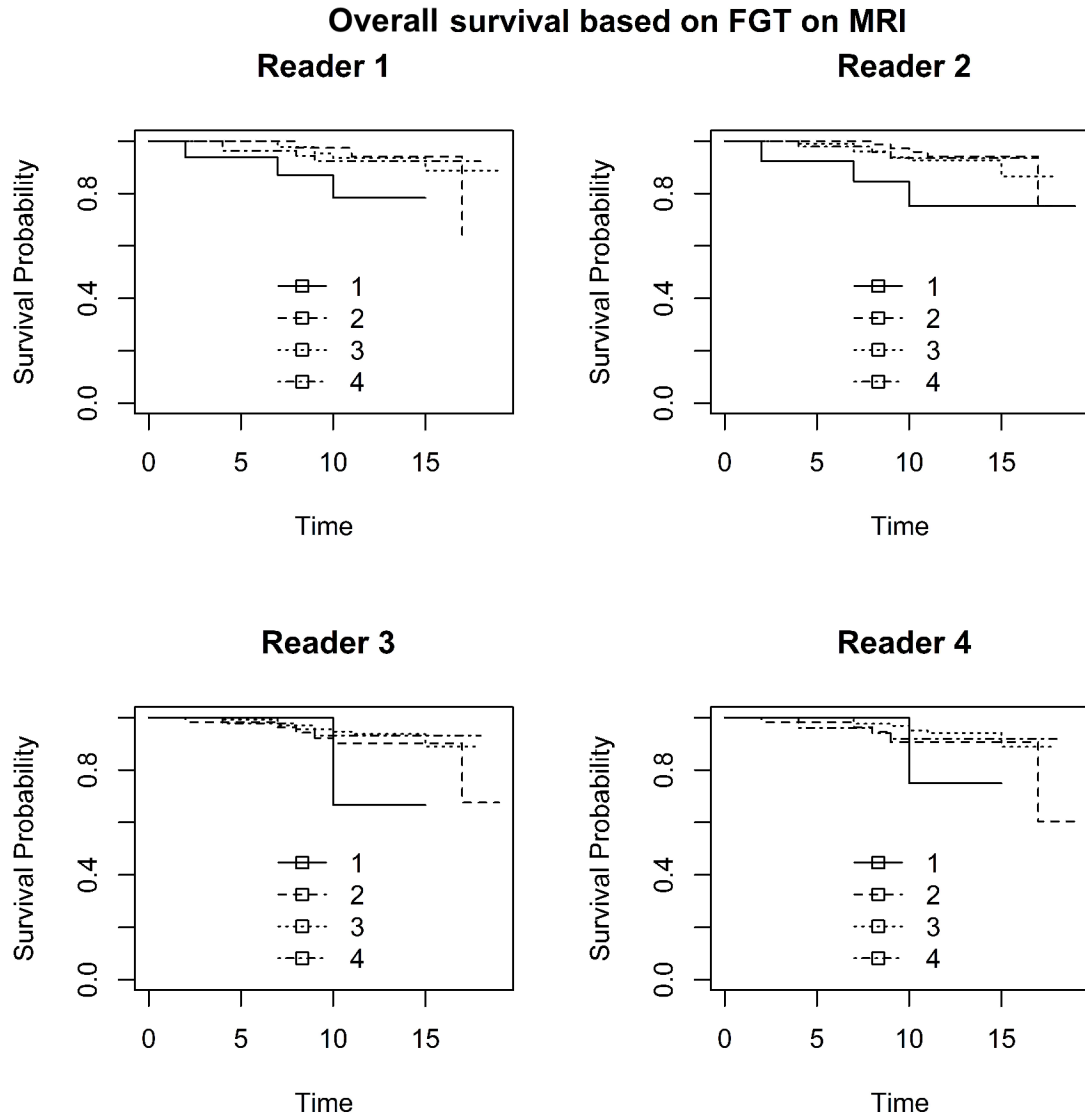

Supplement: MOESM5 [file 18302102]
